# Supplementary material for: Seed predation increases from the Arctic to the Equator and from high to low elevations
Source: PubMed Central journal article supplement — Sci Adv. 2019 Feb 20;5(2):eaau4403. doi: 10.1126/sciadv.aau4403 (PMC6382403; doi:10.1126/sciadv.aau4403), 2019-02-20
Supplement: aau4403_SM.pdf [file aau4403_SM.pdf]

## Supplementary Materials for

### **Seed predation increases from the Arctic to the Equator and from high to low elevations**

A. L. Hargreaves\*, Esteban Suárez, Klaus Mehlreter, Isla Myers-Smith, Sula E. Vanderplank, Heather L. Slinn, Yalma L. Vargas-Rodriguez, Sybille Haeussler, Santiago David, Jenny Muñoz, R. Carlos Almazán-Núñez, Deirdre Loughnan, John W. Benning, David A. Moeller, Jedediah F. Brodie, Haydn J.D. Thomas, P. A. Morales M.

\*Corresponding author. Email: [anna.hargreaves@mcgill.ca](mailto:anna.hargreaves@mcgill.ca)

Published 20 February 2019, *Sci. Adv.* **5**, eaau4403 (2019)

DOI: 10.1126/sciadv.aau4403

#### **This PDF file includes:**

Supplementary Methods

Fig. S1. Photos of field sites and seed predator signs.

Fig. S2. Mean seed predation by site.

Fig. S3. Geographic trends in total predation on sunflower versus oat seeds.

Fig. S4. Large-scale patterns emerged despite variation among the 18 transects.

Fig. S5. Snow cover could steepen latitudinal and elevational interaction gradients.

Fig. S6. Correlations between continuous environmental variables.

Fig. S7. Path diagrams of SEM1 to SEM9.

Table S1. Transect details.

Table S2. Relative performance of SEMs.

Table S3. Multispecies surveys of time to germination.

References (51–75)

## Supplementary Materials

### Supplementary Methods

#### *Geographic variation in exposure to predation*

Interaction strength depends on both interaction intensity (e.g. seed predation risk /day), and the duration individuals are exposed to the interaction (e.g. days seeds spend vulnerable to predation before germinating). For seeds that take a year or more to germinate, those at high-elevations and latitudes may benefit not only from lower predation intensity during snow-free months (as we show; main text), but also lower predation exposure during winter. Insects are inactive during winter and the few experimental assessments we found show that vertebrate seed predation drops by 60 to 70% under snow, though seems unaffected by cold (35, 51). While a robust assessment of geographic patterns in interaction strength (intensity  $\times$  exposure) is beyond the scope of this study, we roughly assessed annual exposure and its potential effect on predation for long-lived seeds. First, we estimated the months each site is covered in  $>10$  cm of snow based on personal field experience and/or online data bases. We then tested whether seed predation was correlated with annual snow duration, i.e. could decreased exposure via increased snow decouple gradients in interaction strength from gradients in interaction intensity. We used mean seed predation (averaged to 1 point/seed species/site as per SEMs) as the response, to match the precision of our snow cover estimates. We used a binomial GLM with snow duration, seed species, and their interaction as predictors. The importance of the interaction term was assessed using likelihood ratio tests (main text) and the interaction dropped if non-significant. Second, we estimated annual relative exposure to seed predation. We discounted the contribution of snow-covered months by either 100% (no predation under snow—the maximum effect snow cover could have on predation gradients) or 65% (reflecting the limited literature estimates (35, 51)). Thus a snow-free site would have 12 exposure months, while a site covered in snow for half the year would have either 6 (100% reduction) or 9.9 (65% reduction) exposure months. We then calculated a unit-less annual exposure as # exposure months / 12 months. Finally, we calculated an exposure-adjusted seed predation estimate by multiplying mean seed predation by the site's exposure fraction (both for 100% and 65% predation reduction).

We tested for geographic patterns using adjusted seed predation as the response and latitude, elevation, and seed species as interacting main effects, using binomial GLMs as above. To assess

the effect of adjusting for snow cover, we compared the effect sizes to a GLM using unadjusted mean seed predation (this model differs from those in the main text by considering a single measure of seed predation/seed species/site). Results are presented in fig. S5.

Of course, estimating clines in annual exposure is only useful if seeds across ecosystems remain as seeds for a year or more; if most seeds germinate quickly the effect of winter is ecologically unimportant. A comprehensive review of latitudinal patterns in germination times is again beyond the scope of this study, but we surveyed the literature for community-level estimates of dormancy (time-to-germination under ideal lab conditions) and time-to-germination under field conditions. We found 16 studies that presented data for >3000 species in the tropics and temperate zone. While most latitudes and biomes had species that took >365 days to germinate under natural conditions, mean time-to-germination in the field was always <1 yr. Thus estimating latitudinal gradients in annual, exposure-adjusted predation is biologically relevant, but only for a subset of seeds.

#### *Structural equation modelling*

We first made a conceptual model, which was too complex to test with the collected data, but clarified our understanding about how predictors affect each other and seed predation and informed structural equation models (SEMs; fig. S5). Latitude and elevation are exogenous variables, whose values do not rely on values of other modelled variables. Climate variables were divided into a) a latent variable 'Climate' comprised of Temperature annual range, Annual precipitation, and Precipitation seasonality, and b) Mean annual temperature, modeled separately to allow temperature to directly affect seed predation via metabolic activity. Both Climate and Mean annual temperature are directly affected by latitude and elevation and directly affect productivity (52), and Mean annual temperature also directly affects seed predation (fig. S5). Productivity is modeled as a latent variable comprised of AET and NPP, which are correlated (fig. S5) but measure slightly different components of productivity (respiration vs. biomass, respectively). We assumed elevation's effect on productivity was captured by its effect on climate and temperature, but that latitude could affect productivity directly via increasing irradiance (solar energy) toward the equator (2, 53). Although productivity is positively correlated with species richness (fig. S4), global analyses suggest high productivity does not

cause high richness or vice versa (48, 54, 55), so we modelled them as affected by climate but independent of each other. We let latitude affect species richness, as recolonization of high latitudes post glaciation has resulted in widespread migration lags (56, 57), which should reduce diversity at higher latitudes independent of modern climate (55). While high elevations were also glaciated, the shorter distances required to cross elevational gradients make migration lags negligible (56, 57). Higher seed predator populations could arise from more productive ecosystems (more food available) or more diverse predator assemblages ('species packing'), so we modelled direct effects of productivity and species richness on seed predation. Finally, to account for effects not captured by other variables, we modelled a direct effect of latitude on seed predation intensity.

From this and results of an earlier analysis of climate and productivity vs. oat predation (23), we generated 15 simpler structural equation models (SEMs), which represented biologically-motivated simplifications of our conceptual model. These SEMs are illustrated in fig. S6, and the hypotheses they represent described fully below. For SEMs 3to8, which include productivity as one of several mechanistic predictors, we ran the model twice, once with productivity as AET (as in (23)) and again with productivity as NPP (modeling productivity as a latent variable comprised of AET and NPP increased the AIC of these models by >80, not shown).

SEM#) SEM name: Hypothesis

SEM1) Climate: seed predation intensity is best explained by climate plus any additional effects of latitude and elevation.

SEM2) Productivity: seed predation intensity is best explained by productivity (AET and NPP combined into a latent variable) plus any additional effects of latitude and elevation.

SEM3) Direct effects: seed predation intensity is best explained by the variables thought to influence it directly.

SEM4) Direct effects no richness: as for SEM3 but excluding species richness, assuming granivore diversity is unimportant or poorly captured by vertebrate richness.

SEM5) 'Orrock' structured: predation is best explained using the variables that explained granivory on oat seeds in temperate grasslands in the Americas (23). The effect of latitude is captured by its effects on climate and AET or NPP (23). Elevation can affect

seed predation indirectly via an effect on AET/NPP; this represents the indirect effect of elevation on AET/NPP mediated by Mean annual temperature from the conceptual model. We let Annual temperature range affect seed predation directly, to represent the more direct potential effects of temperature vs. precipitation.

SEM6) 'Orrock' more linear: as for SEM5 but without the indirect effects of elevation and Annual temperature range via AET/NPP.

SEM7) 'Orrock' unstructured: as for SEM5 but climate and productivity variables are modelled independently rather than hierarchically.

SEM8) 'Orrock' direct only: including only variables identified as important in (23) for which direct effect can be reasonably hypothesized.

Finally, we compared the simplest possible model for each variable thought to have direct effects on seed predation intensity (SEM9-12) or that significantly affected predation in (23) (SEM13-14) to a model with latitude (SEM15). All models also included elevation, with both variables modelled as exogenous with the structure shown in fig. S6 SEM9.

SEM9) Mean annual temperature + elevation

SEM10) AET + elevation

SEM11) NPP + elevation

SEM12) Species richness + elevation

SEM13) Annual temperature range + elevation

SEM14) Annual precipitation + elevation

SEM15) Latitude + elevation

## Supplementary Figures

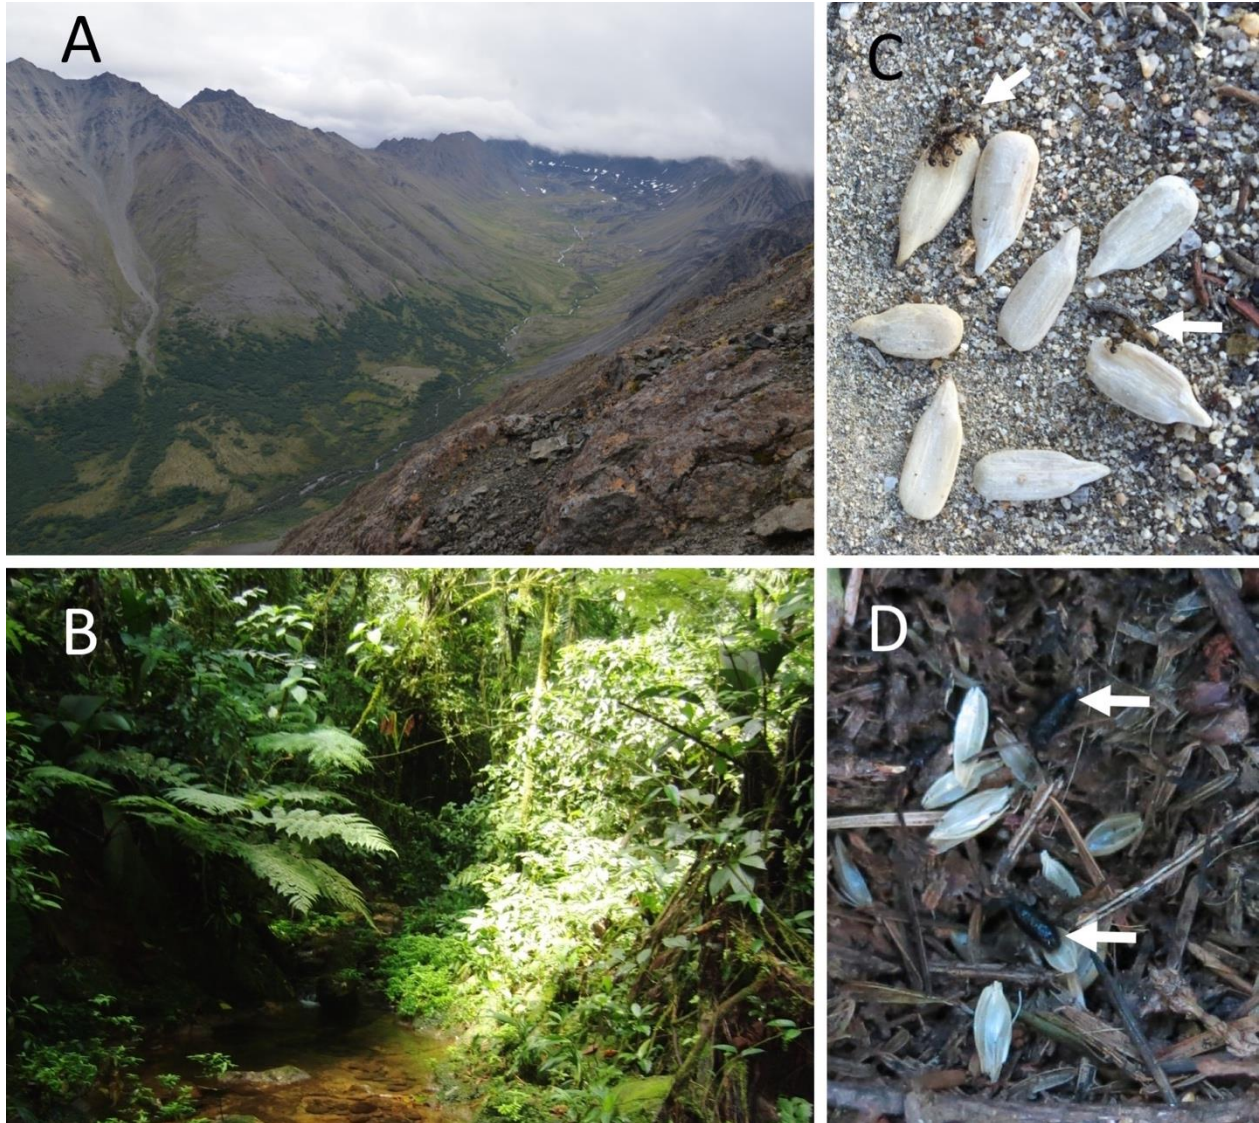

**Fig. S1. Photos of field sites and seed predator signs.** (A) Highest site at our most polar transect (1430 masl, Alaska, well above upper tree line), and (B) one of our lowland tropical sites at 700 masl in Costa Rica. (C) Sunflower depot with six intact and two partially consumed seeds still being eaten by ants (arrows). (D) Oat depot with no intact seeds—husks peeled from seeds and small mammal droppings (arrows) indicate mammal predation. Photo credits: (A) J. Brodie, University of Montana; (B) H. Slinn, University of Nevada, (C) S. Vanderplank, Botanical Research Institute of Texas; (D) A. Hargreaves (McGill University).

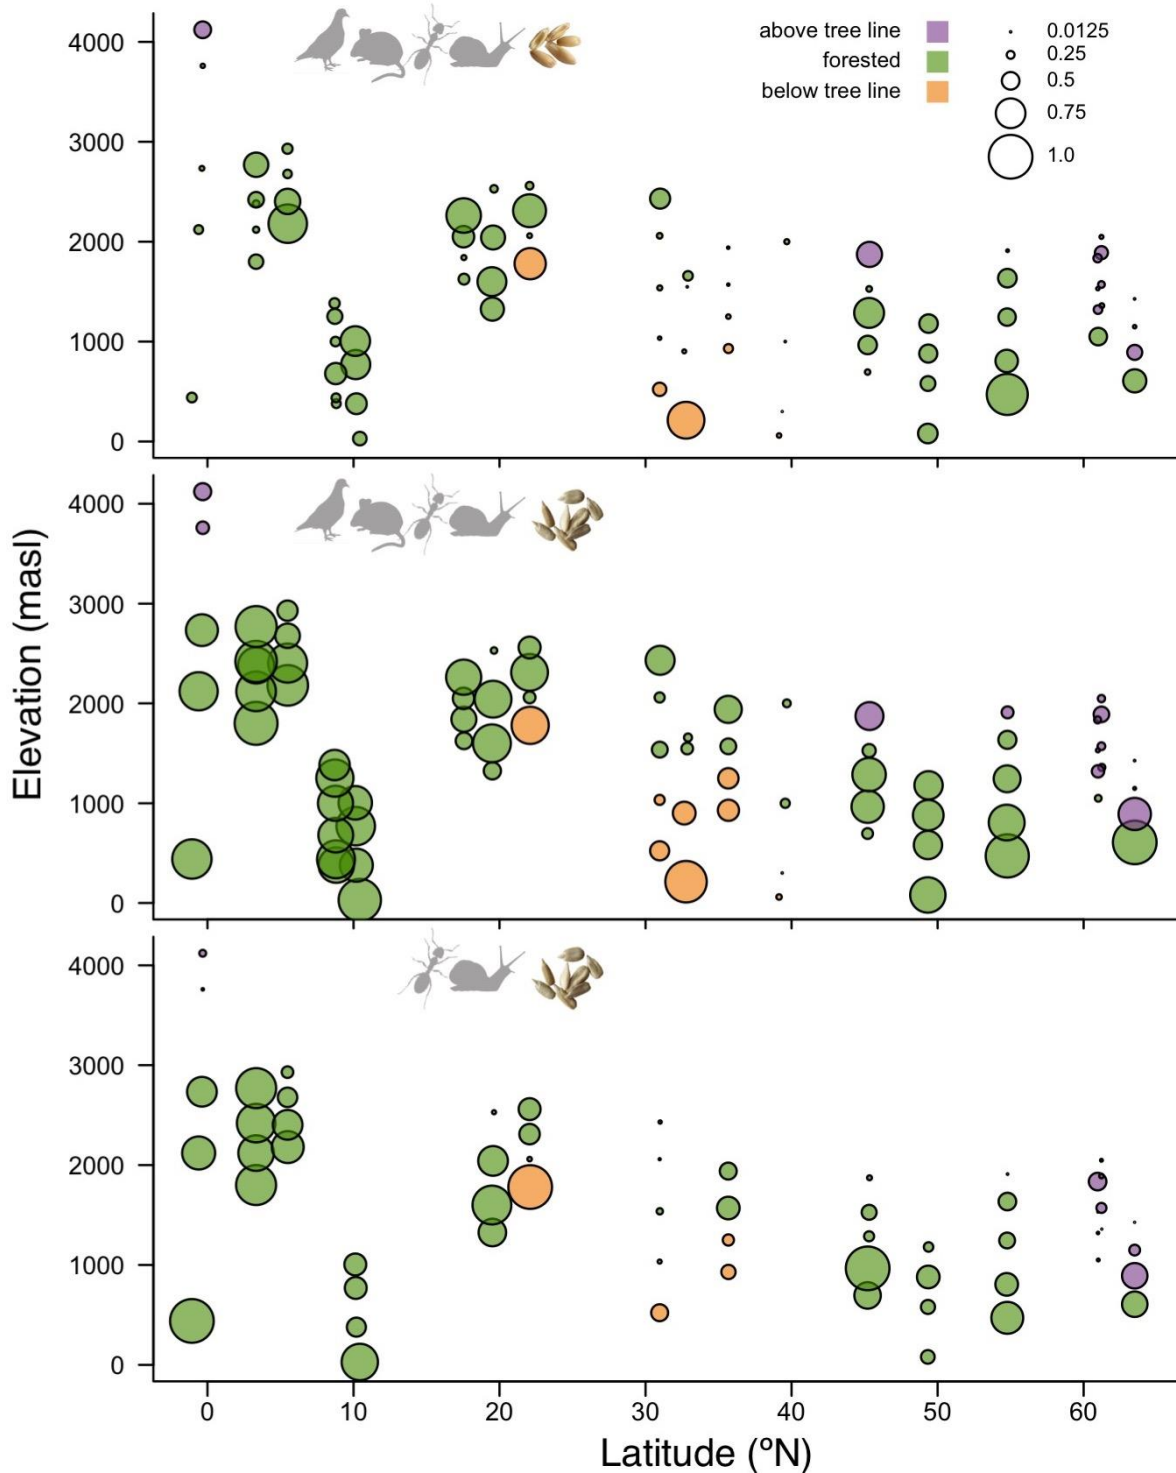

**Fig. S2. Mean seed predation by site.** Circle centre shows the latitudinal and elevational location of each site, size shows the mean fraction of predated seeds, averaged across depots and runs, colour shows site biome. From top, panels show total predation on oats, total predation on sunflower seeds, and invertebrate predation on sunflower seeds (i.e. depots caged to exclude vertebrates).

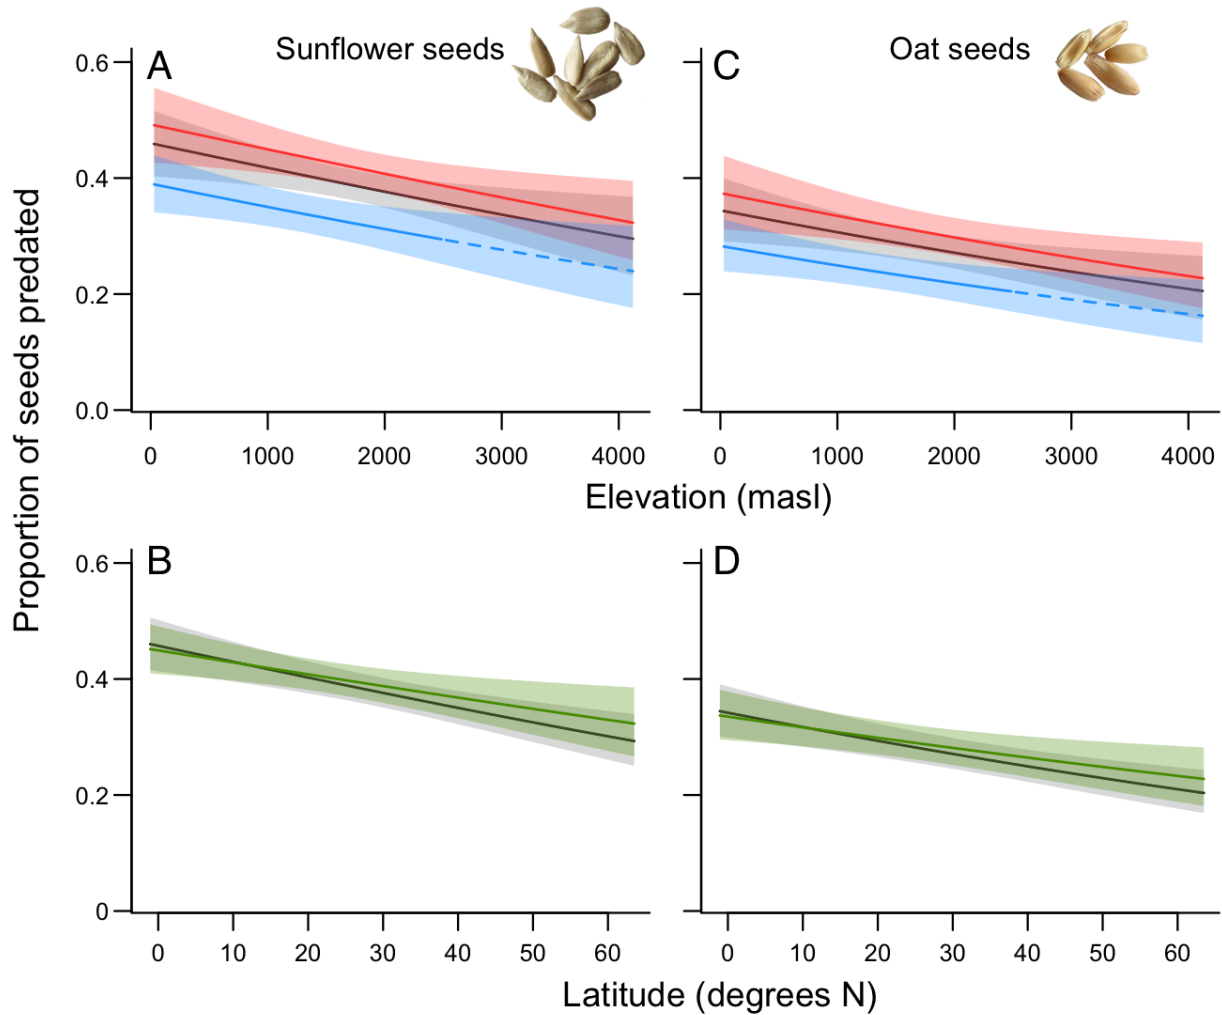

**Fig. S3. Geographic trends in total predation on sunflower versus oat seeds.** Lines and shading show trend line  $\pm$  95% confidence intervals fitted by GLMMs (A and B correspond to Fig. 1D and E). All models include seed type as a factor; seed type was always significant, but never interacted with latitude or elevation, i.e. geographic patterns were consistent between sunflower (A, B) and oat seeds (C, D). Latitudinal trends (A, C) are shown for the median elevation (1500 m) across biomes (black; Model 2), and in forests (green; Model 5). Elevational trends (B, D) are shown at the median latitude (31°N; black), median tropical latitude (10.5°N; red), and median temperate latitude 47.7°N; blue, all Model 2). Dashed portion of the line shows trends extrapolated above 2500 m; we had no temperate sites above 2500 m because vegetation stops at lower elevations at higher latitudes. Total predation was 11% higher on sunflower vs. oat seeds across biomes (Model 2), and in forests specifically (Model 5). Full GLMM results are in Table 1.



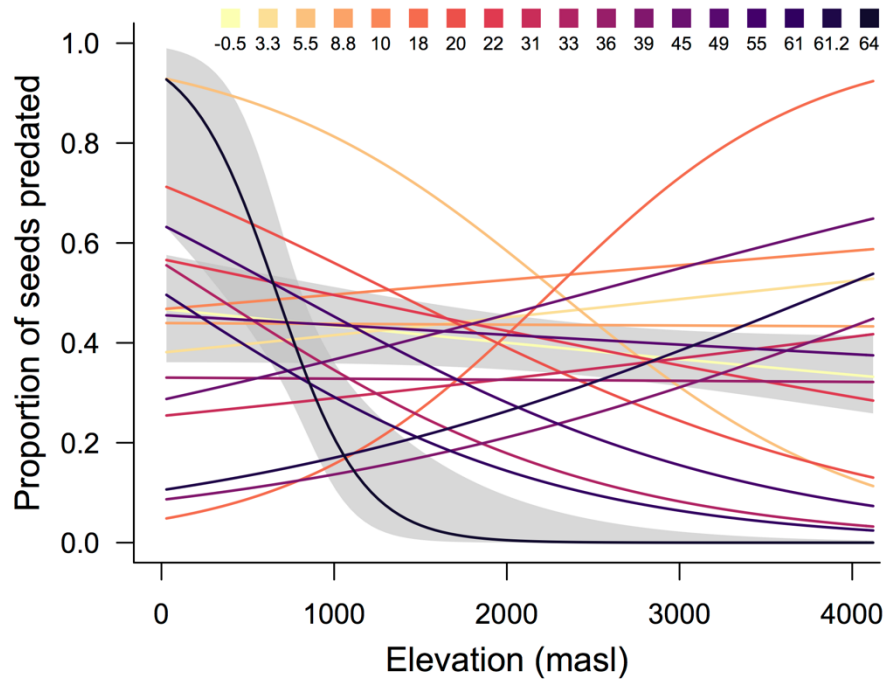

**Fig. S4. Large-scale patterns emerged despite variation among the 18 transects.** Trend lines show total predation on sunflower seeds and are for illustrative purposes only, taken from a binomial GLMM that considered transect latitude as a categorical variable with 18 levels, 1 per transect (seed predation ~ factorLatitude × elevation + seed.species). 95% confidence intervals are shown for the extreme latitudes only, otherwise their overlap obscures trend lines. Colour scale denotes the latitude of each transect in decimal degrees.

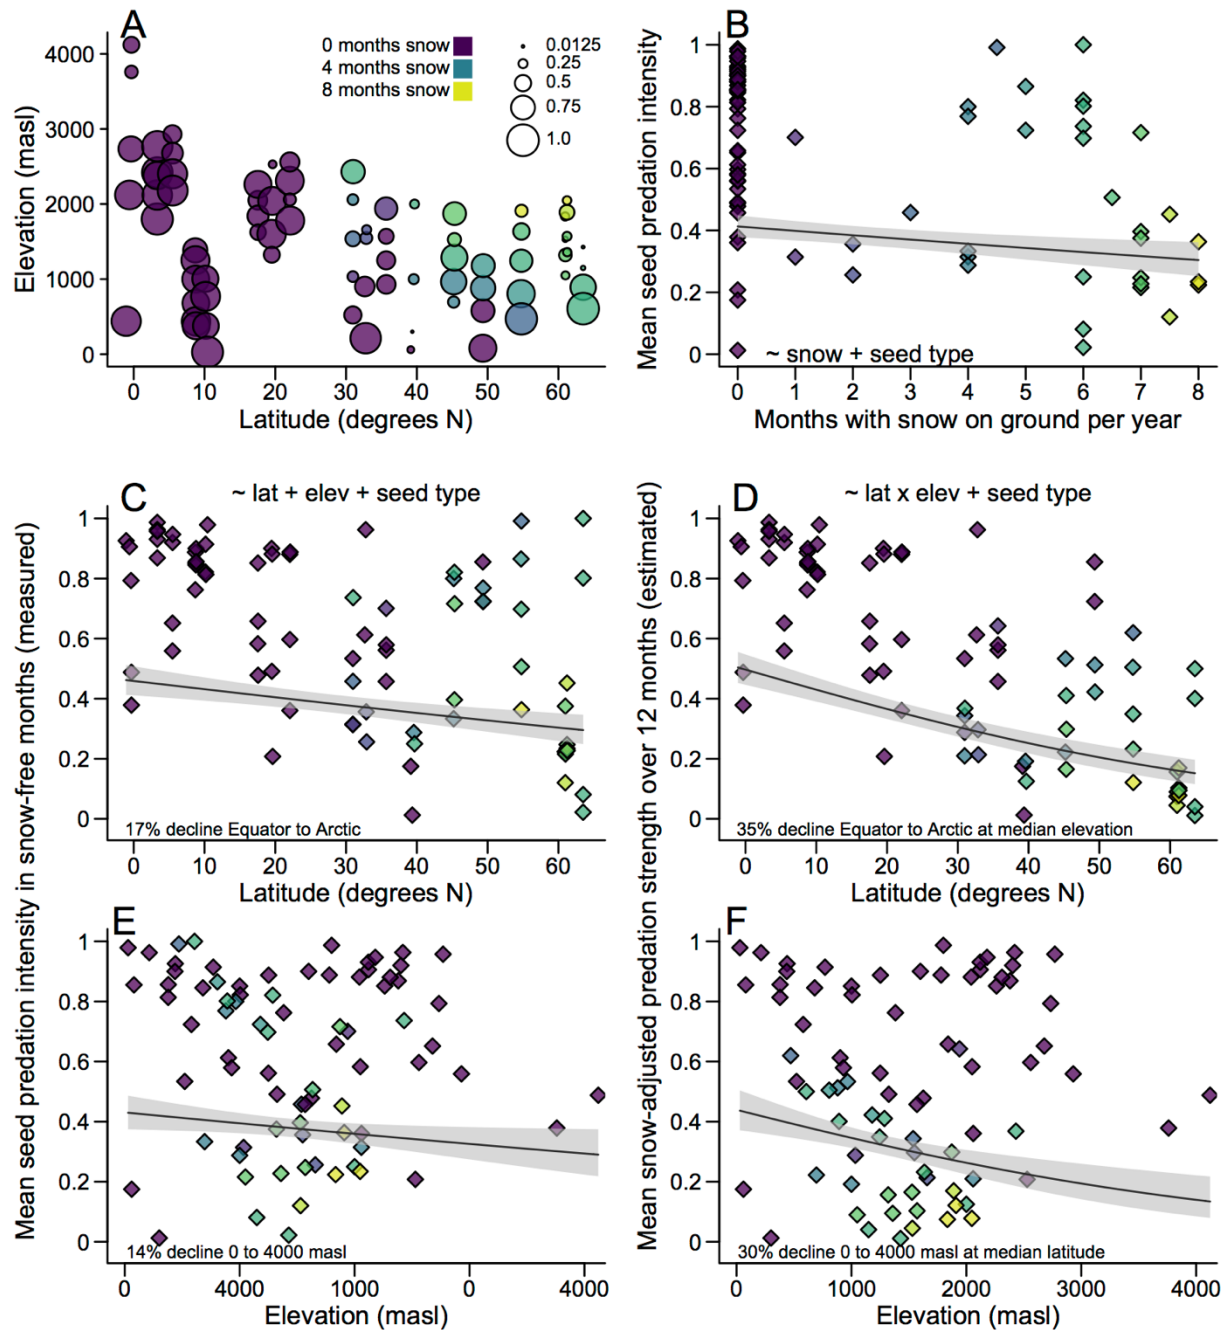

**Fig. S5. Snow cover could steepen latitudinal and elevational interaction gradients.** All plots show seed predation averaged to 1 data point/seed type/site as in SEMs, and annual duration of snow cover >10 cm (point colour). **(A)** Snow duration vs. latitude, elevation, and mean seed predation intensity during snow-free months (point size). Even high-elevation sites in the tropics are snow free, whereas snow duration increases with elevation and latitude in the temperate zone (North of 23.5°N). **(B)** Snow duration is weakly negatively related to snow-free seed predation intensity, such that snow is more likely to shelter seeds that already experience lower predation. Effect of snow:  $\chi^2=9.9_{df=1}$ ,  $P=0.0016$ . **(C&E)** Mean seed predation intensity with latitude and elevation, for comparison to D&F only (seed predation intensity results should be taken from models in main text that consider >1 data point/site). Points show raw means (i.e. points in C are

unadjusted for elevation, points in E are unadjusted for latitude). Trend lines and 95% CI are from the minimum adequate binomial GLM shown in top text. **(D&F)** Estimated mean seed predation strength for seeds that take >1 yr to germinate: daily seed predation intensity from C&E  $\times$  fraction of year at full predation intensity, assuming no predation under snow. Points & lines as in C/E; discounting for snow creates a latitude  $\times$  elevation interaction, as no elevations have snow cover in the tropics whereas snow varies with elevation in the temperature zone (A). Accounting for reduced exposure under snow could double latitudinal (C vs. D) and elevational (E vs. F) clines in seed predation risk at median latitudes (the effect is less at low latitudes/elevations and greater at high latitudes/elevations). If one instead assumes that snow reduces seed predation by 65% rather than 100%, there is no longer a significant latitude  $\times$  elevation interaction and the clines are more similar to those in predation intensity (C/E): 27% and 18%, across latitudes and elevations, respectively. Seed type never interacted with other main factors, so results are shown for predation on uncaged sunflower seeds only.

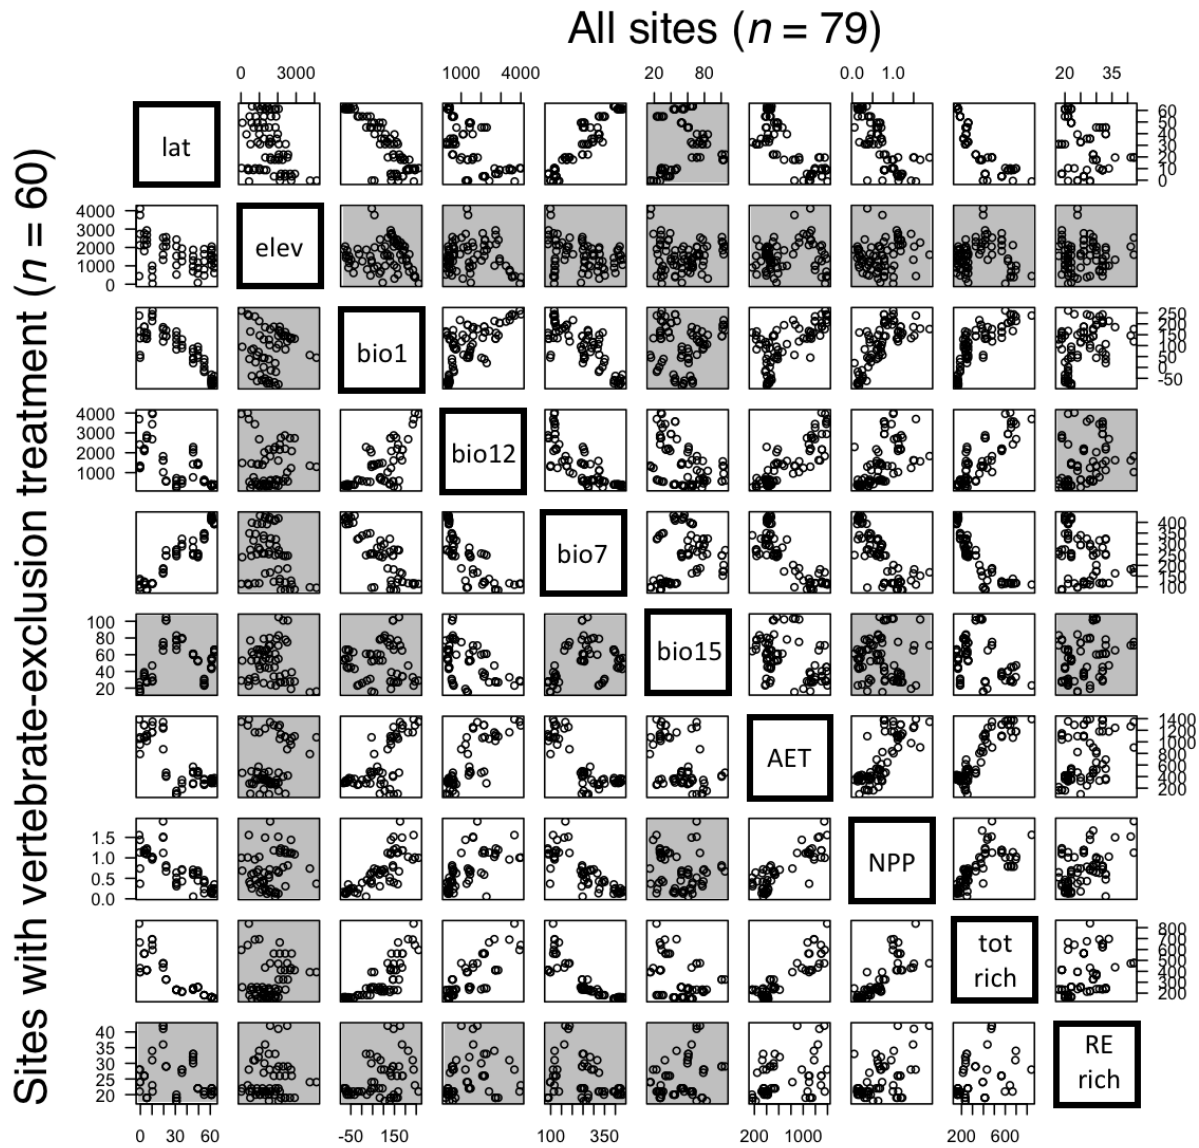

**Fig. S6. Correlations between continuous environmental variables** (latitude, elevation, mean annual temperature (bio1), mean annual precipitation (bio12), annual temperature range (bio7), seasonality of precipitation (bio15), actual annual evapotranspiration (AET), net primary productivity (NPP), total vertebrate species richness, and rodent and shrew richness). Plots above the diagonal show correlations among all 79 sites, plots below the diagonal show correlations among the 60 sites where the caging experiment was conducted. Grey background indicates correlations that are not significant after correcting for multiple comparisons.

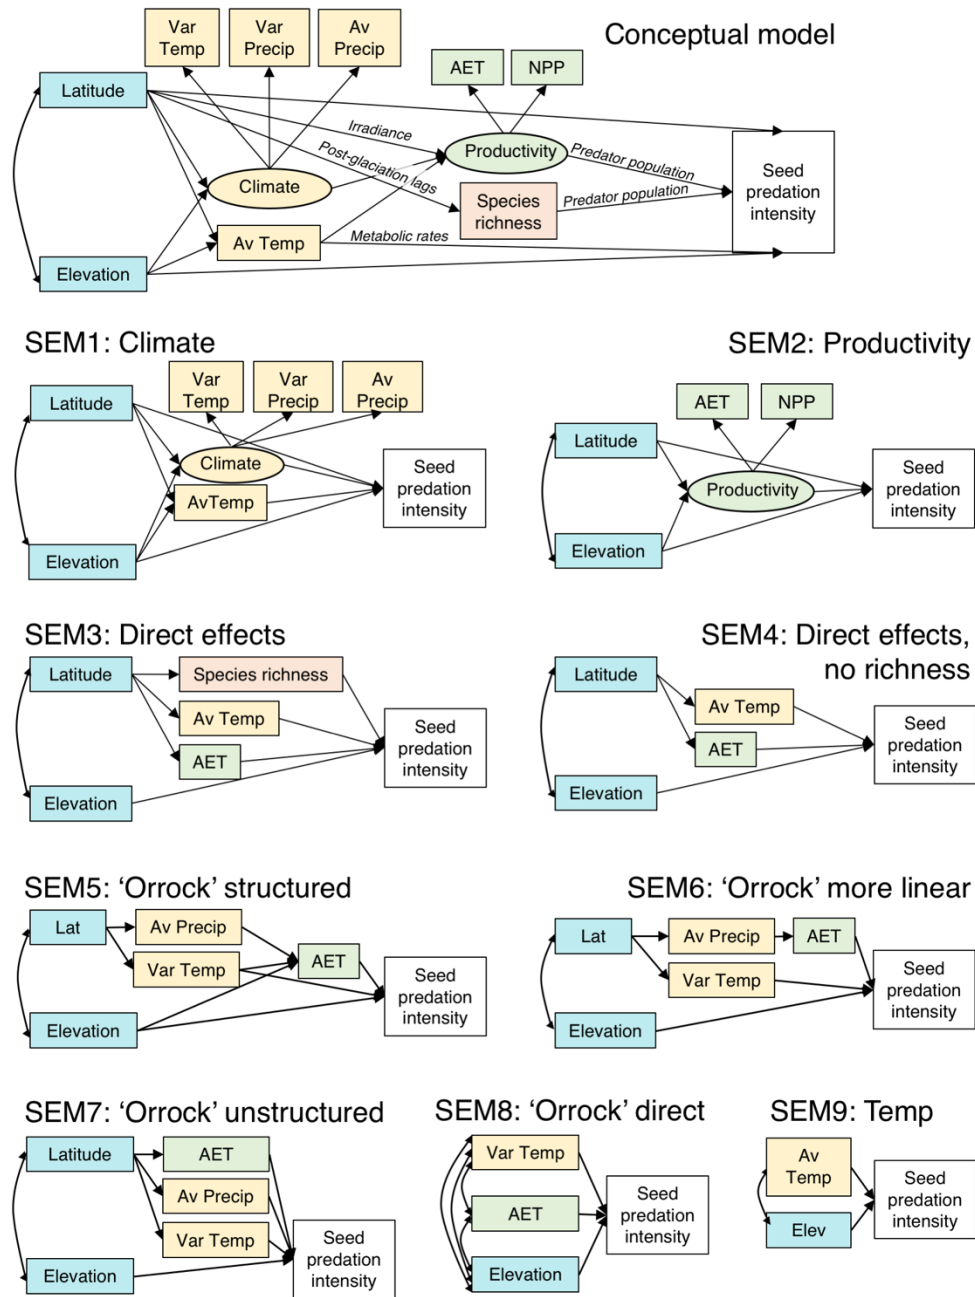

**Fig. S7. Path diagrams of SEM1 to SEM9.** Manifest variables are boxes, latent variables are ovals, straight arrows denote regression effects and curved double-headed arrows denote correlations. Climate variables (yellow) are Mean annual temperature (Av Temp), Annual temperature range (Var Temp), Annual precipitation (Av Precip), and Precipitation seasonality (Var Precip). Productivity variables (green) are Annual Evapotranspiration (AET) and Net primary productivity (NPP). Italics along conceptual model arrows give the hypothesized reason for these effects. For 'Species richness', models of predation on sunflower seeds use total vertebrate richness, whereas models of predation on oat seeds use the total richness of rodents and shrews. Models 10 to 15 have the same structure as SEM9.

## Supplementary Tables

**Table S1. Transect details.**

| Country                 | Latitude<br>(decimal °) | Transect elevation (m) |      |                   | Tree line elevation (m) |       |
|-------------------------|-------------------------|------------------------|------|-------------------|-------------------------|-------|
|                         |                         | Min                    | Max  | Total             | Upper                   | Lower |
| USA                     | 63.5                    | 605                    | 1430 | 825               | 640                     | –     |
| Canada <sup>2</sup>     | 61.2                    | 1050                   | 1835 | 1000 <sup>1</sup> | 1200                    | –     |
| Canada                  | 61.2                    | 1360                   | 2050 | 1000 <sup>1</sup> | 1200                    | –     |
| Canada                  | 54.8                    | 470                    | 1910 | 1440              | 1650                    | –     |
| Canada                  | 49.4                    | 80                     | 1180 | 1100              | 1350                    | –     |
| USA                     | 45.4                    | 695                    | 1875 | 1180              | 1850                    | 630   |
| USA                     | 39.9                    | 60                     | 2000 | 1940              | 2200                    | 100   |
| USA                     | 35.7                    | 930                    | 1940 | 1010              | 3100                    | 1550  |
| USA                     | 33.0                    | 210                    | 1660 | 1450              | 3100                    | 1350  |
| Mexico                  | 31.0                    | 520                    | 2430 | 1910              | 3000                    | 1500  |
| Mexico                  | 22.1                    | 1780                   | 2560 | 780               | 2600                    | 1800  |
| Mexico <sup>3</sup>     | 19.6                    | 1325                   | 2530 | 1205              | 4000                    | –     |
| Mexico                  | 17.2                    | 1625                   | 2265 | 640               | 3600                    | –     |
| Costa Rica              | 10.4                    | 25                     | 1005 | 980               | 2700                    | –     |
| Panama <sup>2</sup>     | 8.8                     | 380                    | 1380 | 1000              | 3100                    | –     |
| Colombia                | 5.5                     | 2180                   | 2930 | 750               | 3750                    | –     |
| Colombia <sup>2,3</sup> | 3.3                     | 1800                   | 2770 | 970               | 3700                    | –     |
| Ecuador <sup>3</sup>    | -0.7                    | 440                    | 4120 | 3680              | 3750                    | –     |

<sup>1</sup> Total elevation combined over the two transects at this latitude (Yukon, Canada)

<sup>2</sup> Location of one or two sites were adjusted between runs of the experiment. Thus the transect had four sites each run but five (or six, for Panama) sites in total.

<sup>3</sup> These transects were less accessible, so instead of setting up all sites on one day and checking them all the following day, sites were split into two groups and tested consecutively (ie the experiment was run over 4 days)

**Table S2. Relative performance of SEMs.** Performance of all SEMs (fig. S7) in explaining the intensity of total invertebrate seed predation. Models 3–8 were run twice, once with productivity given by AET and again with productivity given by NPP (modeling productivity as a latent variable in SEM3–8 increased AICs by >80, not shown). Top model(s) for each data set (lowest AIC) are in bold. Annual temperature range best explained total predation intensity on sunflower seeds, while annual temperature range and latitude equally explained total predation intensity on oats. We did not find support for the predicted stronger role of temperature on invertebrate predation, which was best explained by a non-mechanistic model including only elevation and latitude. Simpler models preformed the best, and additional complexity via indirect effects, latent variables, or more than two predictors increased AIC values and resulted in poor model fits. We assessed model goodness-of-fit using the Tucker-Lewis Index (<0.9 indicates poor fit, 74) and Root Mean Square Error of Approximation (>0.1 indicates poor fit, 75)\*.

| Structural Equation Model            | Total predation sunflower |               | Total predation oat |               | Invert predation sunflower |               |
|--------------------------------------|---------------------------|---------------|---------------------|---------------|----------------------------|---------------|
|                                      | $\Delta$ AIC              | TLI, RMSEA    | $\Delta$ AIC        | TLI, RMSEA    | $\Delta$ AIC               | TLI, RMSEA    |
| SEM1: Climate                        | 475                       | 0.46, 0.45    | 470                 | 0.44, 0.45    | 361                        | 0.56, 0.40    |
| SEM2: Productivity                   | 301                       | 1, 0          | 298                 | 1, 0          | 195                        | 1.0, 0        |
| SEM3: Direct effects AET             | 420                       | 0.14, 0.61    | 511                 | 0.05, 0.51    | 313                        | 0.34, 0.51    |
| SEM3: Direct effects NPP             | 423                       | 0.33, 0.49    | 514                 | 0.25, 0.42    | 304                        | 0.21, 0.58    |
| SEM4: Direct effects no richness AET | 296                       | 0.09, 0.60    | 292                 | 0.02, 0.60    | 217                        | 0.17, 0.59    |
| SEM4: Direct effects no richness NPP | 303                       | 0.22, 0.52    | 295                 | 0.02, 0.50    | 207                        | 0.30, 0.54    |
| SEM5: Orrock structured AET          | 392                       | 0.33, 0.51    | 391                 | 0.26, 0.52    | 314                        | 0.32, 0.51    |
| SEM5: Orrock structured NPP          | 448                       | 0.23, 0.51    | 448                 | 0.15, 0.52    | 324                        | 0.32, 0.50    |
| SEM6: Orrock more linear AET         | 362                       | 0.61, 0.38    | 362                 | 0.57, 0.40    | 294                        | 0.59, 0.39    |
| SEM6: Orrock more linear NPP         | 437                       | 0.47, 0.42    | 436                 | 0.41, 0.43    | 320                        | 0.50, 0.42    |
| SEM7: Orrock unstructured AET        | 405                       | 0.36, 0.49    | 404                 | 0.30, 0.50    | 309                        | 0.44, 0.46    |
| SEM7: Orrock unstructured NPP        | 408                       | 0.56, 0.38    | 408                 | 0.50, 0.40    | 298                        | 0.58, 0.39    |
| SEM8: Orrock direct only AET         | 129                       | —             | 129                 | —             | 115                        | —             |
| SEM8: Orrock direct only NPP         | 154                       | —             | 154                 | —             | 108                        | —             |
| SEM9: Mean Temperature               | 21                        | —             | 10                  | —             | 18                         | —             |
| SEM10: AET                           | 16                        | —             | 7.6                 | —             | 14                         | —             |
| SEM11: NPP                           | 15                        | —             | 4.5                 | —             | 4.3                        | —             |
| SEM12: Species richness              | 13                        | —             | 12                  | —             | 17                         | —             |
| SEM13: Temperature range             | <b>0</b>                  | —             | <b>0</b>            | —             | 10                         | —             |
|                                      |                           | (AIC = 638.2) |                     | (AIC = 666.6) |                            |               |
| SEM14: Mean Precipitation            | 16                        | —             | 8.9                 | —             | 26                         | —             |
| SEM15: Latitude                      | 4.2                       | —             | <b>1.4</b>          | —             | <b>0</b>                   | —             |
|                                      |                           |               |                     |               |                            | (AIC = 476.4) |

\* TLI = 1 and RMSEA = 0 for SEM9 to SEM15, in which all predictors directly affect the response.

**Table S3. Multispecies surveys of time to germination** under natural field conditions (exposure to post-dispersal seed predation) and ideal lab or greenhouse conditions (dormancy). Days to germinate are species means, so ‘Mean’ is the across-species average.

| Study                               |              | Latitude zone | Biome              | N spp | Days to germinate |     |     |
|-------------------------------------|--------------|---------------|--------------------|-------|-------------------|-----|-----|
| Ref                                 | Country      |               |                    |       | Mean              | Min | Max |
| Time to germinate in field          |              |               |                    |       |                   |     |     |
| (58)                                | Brazil       | Tropics       | Forest             | 319   | 36                | 4   | 450 |
|                                     | India        | Tropics       | Forest             | 90    | 17                | 8   | 45  |
|                                     | Ivory Coast  | Tropics       | Forest             | 277   | 48                | 7   | 810 |
|                                     | Malaysia     | Tropics       | Forest             | 114   | 72                | 9   | 669 |
|                                     | Panama       | Tropics       | Forest             | 237   | 55                | 5   | 404 |
| (59)                                | Panama       | Tropics       | Forest             | 100   | 36                | 4   | 450 |
| (60)                                | Mexico       | Tropics       | Forest             | 10    | 102               | 49  | 434 |
| (61)                                | China        | Tropics       | Forest             | 4     | 21                | 5   | 139 |
| (62)                                | Ghana        | Tropics       | Forest             | 18    | 40                | 20  | 110 |
| (63)                                | Australian   | Tropics       | Grassland          | 6     | 175               | 160 | 196 |
| (64)                                | USA (CA)     | Temperate     | Grassland          | 6*    | 23                | 14  | 26  |
| (65)                                | USA (IL)     | Temperate     | Grassland          | 31    | 21**              | 4   | —   |
| (66)                                | Tibet        | Temperate     | Alpine             | 265   | 225***            | —   | —   |
| (67)                                | Canada (NWT) | Temperate     | Forest             | 10    | 301               | 2   | —   |
| Time to germinate in lab (dormancy) |              |               |                    |       |                   |     |     |
| (68)                                | Panama       | Tropics       | Forest             | 4     | —                 | 10  | 45  |
| (62)                                | Ghana        | Tropics       | Forest             | 16    | 25                | 7   | 65  |
| (69)                                | Tibet        | Temperate     | Alpine             | 134   | —                 | 5   | 28  |
| (70)                                | Tibet        | Temperate     | Alpine             | 633   | 14                | 0   | 53  |
| (71)                                | China        | Temperate     | All                | 726   | 18                | —   | —   |
|                                     |              | Temperate     | Forest             | 393   | 29                | —   | —   |
| (72)                                | Argentina    | Temperate     | Forest & Grassland | 17    | 12                | 8   | —   |
| (73)                                | USA (CO)     | Temperate     | Alpine             | 16    | 15                | 2   | >30 |

\*all native, annual species. Mean is days to reach 50% emergence.

\*\*germination only followed for 28 d, 31/32 species had some seeds germinate in <28d. Mean is estimated assuming seeds that did not germinate in 28 d would have taken 30 d

\*\*\*seeds were only followed for 1 year
